# Supplementary material for: Ionothermal synthesis of aggregated α-Fe2O3 nanoplates and their magnetic properties
Source: Royal Society of Chemistry journal article supplement (doi:10.1039/c1nr10975h), 2011-01-01
Supplement: c1nr10975h.pdf [file c1nr10975h.pdf]

# Ionothermal synthesis of aggregated $\alpha$ -Fe<sub>2</sub>O<sub>3</sub> nanoplates and their magnetic properties

*Jianmin Ma,<sup>a, b</sup> Taihong Wang,<sup>a</sup> Xiaochuan Duan,<sup>b</sup> Jiabiao Lian,<sup>b</sup> Zhifang Liu<sup>b</sup> and Wenjun Zheng<sup>b\*</sup>*

<sup>a</sup>Key Laboratory for Micro-Nano Optoelectronic Devices of Ministry of Education, State Key Laboratory for Chemo/Biosensing and Chemometrics, Hunan University, Changsha, P. R. China

<sup>b</sup>Department of Materials Chemistry, Key Laboratory of Advanced Energy Materials Chemistry (MOE), College of Chemistry, Nankai University, Tianjin, P. R. China

Corresponding Author:

Prof. Wenjun Zheng, [zhwj@nankai.edu.cn](mailto:zhwj@nankai.edu.cn)

## Supporting Information

### List of Figures

**Fig. S1** (a and) SEM images of the aggregated  $\alpha$ -Fe<sub>2</sub>O<sub>3</sub> nanoplates assembled by nanoplatelets.

**Fig. S2** EDX spectrum of the aggregated  $\alpha$ -Fe<sub>2</sub>O<sub>3</sub> nanoplates assembled by nanoplatelets.

**Fig. S3** TEM image and XRD pattern of the sample synthesized in the mixed solution of [Pmim]I and distilled water with a volume ratio of 2:1 while other condition kept constant. (The irregular nanoplates have a diameter of about 18 nm.)

**Fig. S4** The products obtained for different times: (a) SEM image and (b and c) TEM images for 1h; (d) SEM image and (e and f) TEM images for 3h; (g) SEM image and (h and i) TEM images for 5h; (l) SEM image and (m and n) TEM images for 7h.

**Fig. S5** XRD pattern for the products obtained for different times: (a) 1h; (b) 3h, (c) 5h; (d) 7h and 12h.

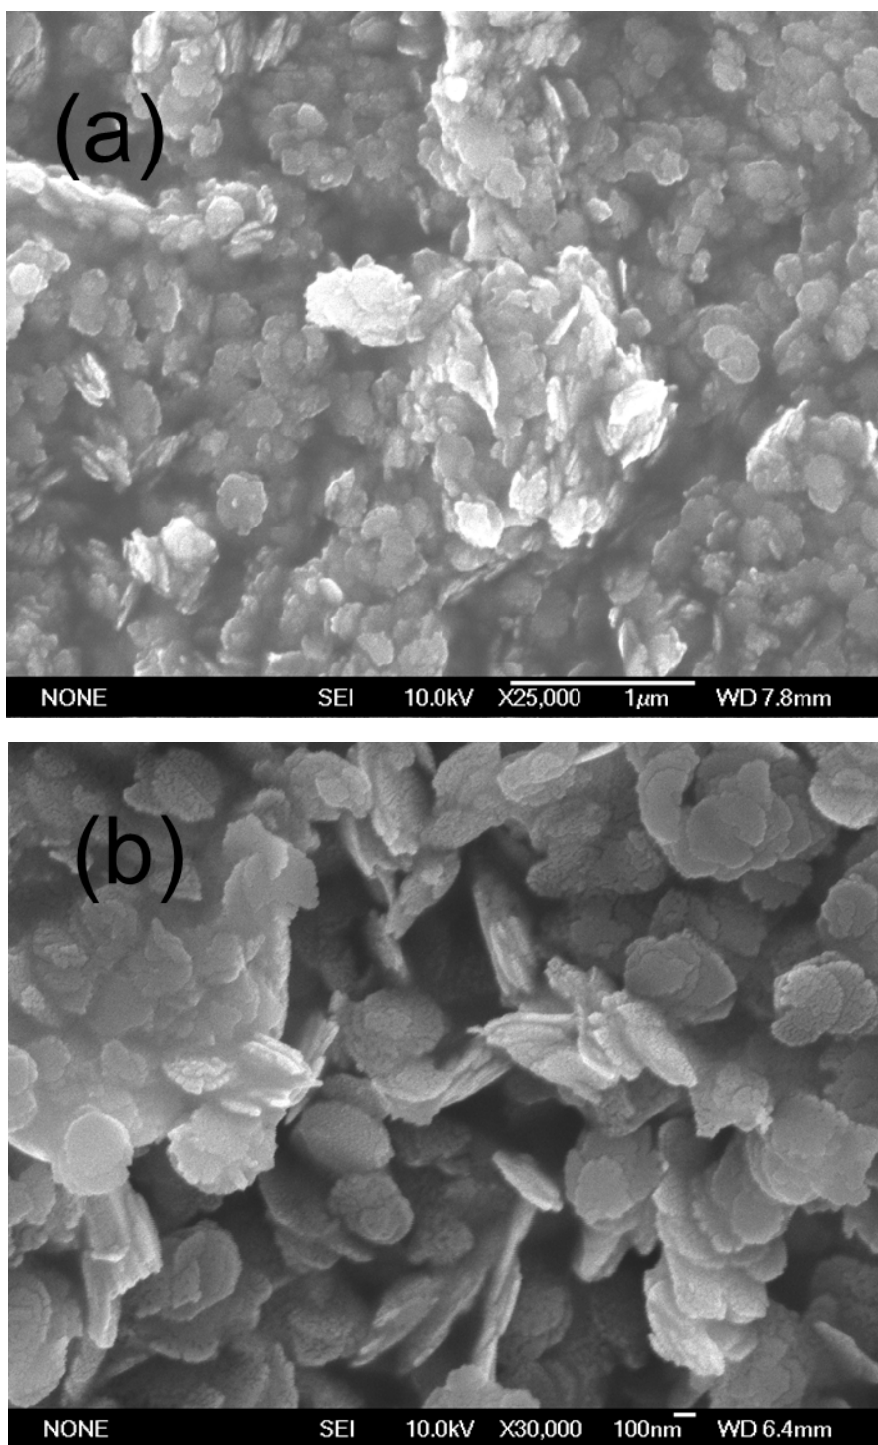

**Fig. S1** (a and b) SEM images of the aggregated  $\alpha$ -Fe<sub>2</sub>O<sub>3</sub> nanoplates assembled by nanoplatelets.

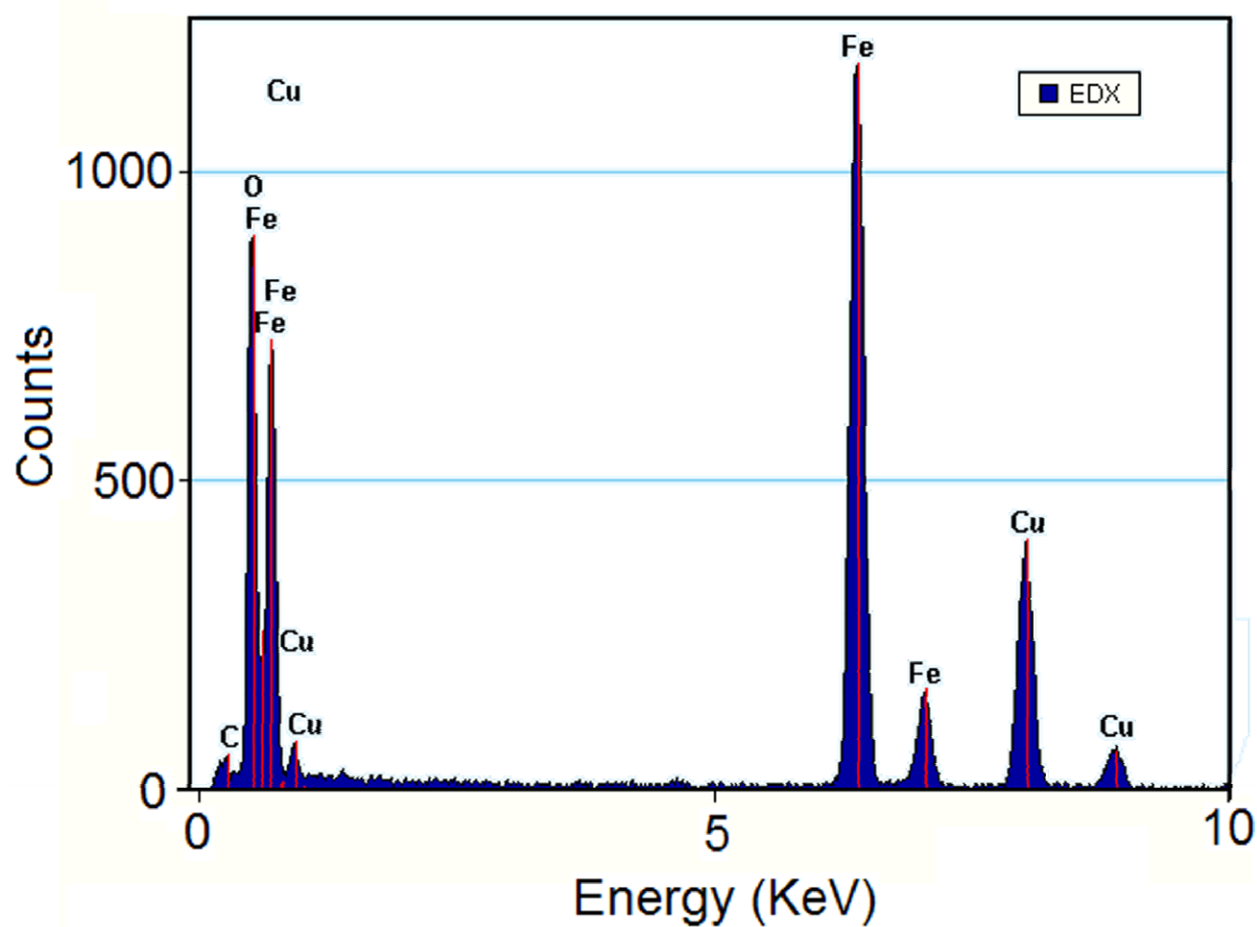

**Fig. S2** EDX spectrum of the aggregated  $\alpha$ - $\text{Fe}_2\text{O}_3$  nanoplates assembled by nanoplatelets.

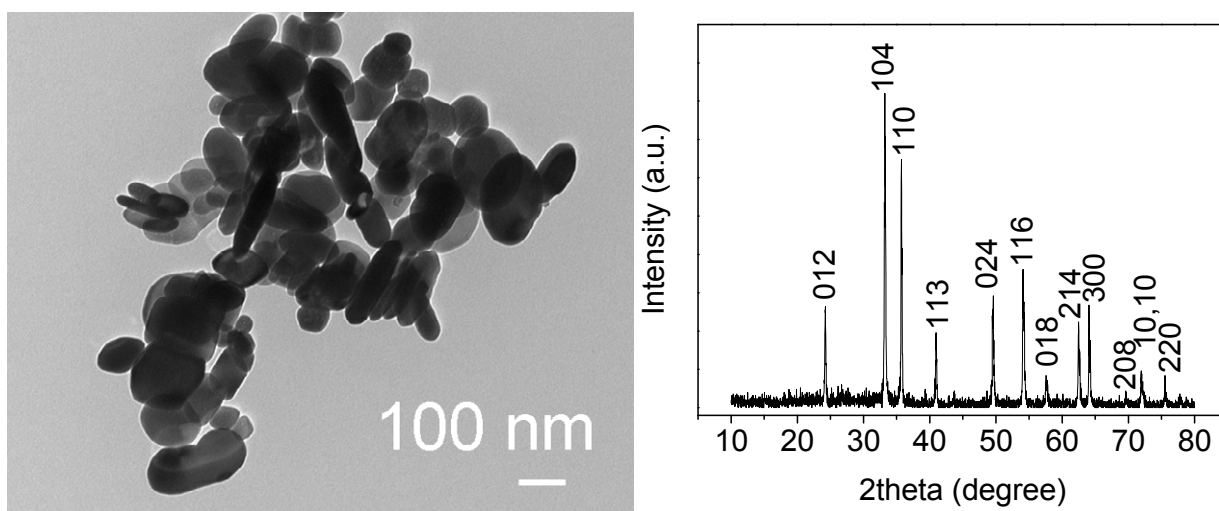

**Fig. S3** TEM image and XRD pattern of the sample synthesized in the mixed solution of [Pmim]I and distilled water with a volume ratio of 2:1 while other condition kept constant. (The irregular nanoplates have a diameter of about 18 nm.)

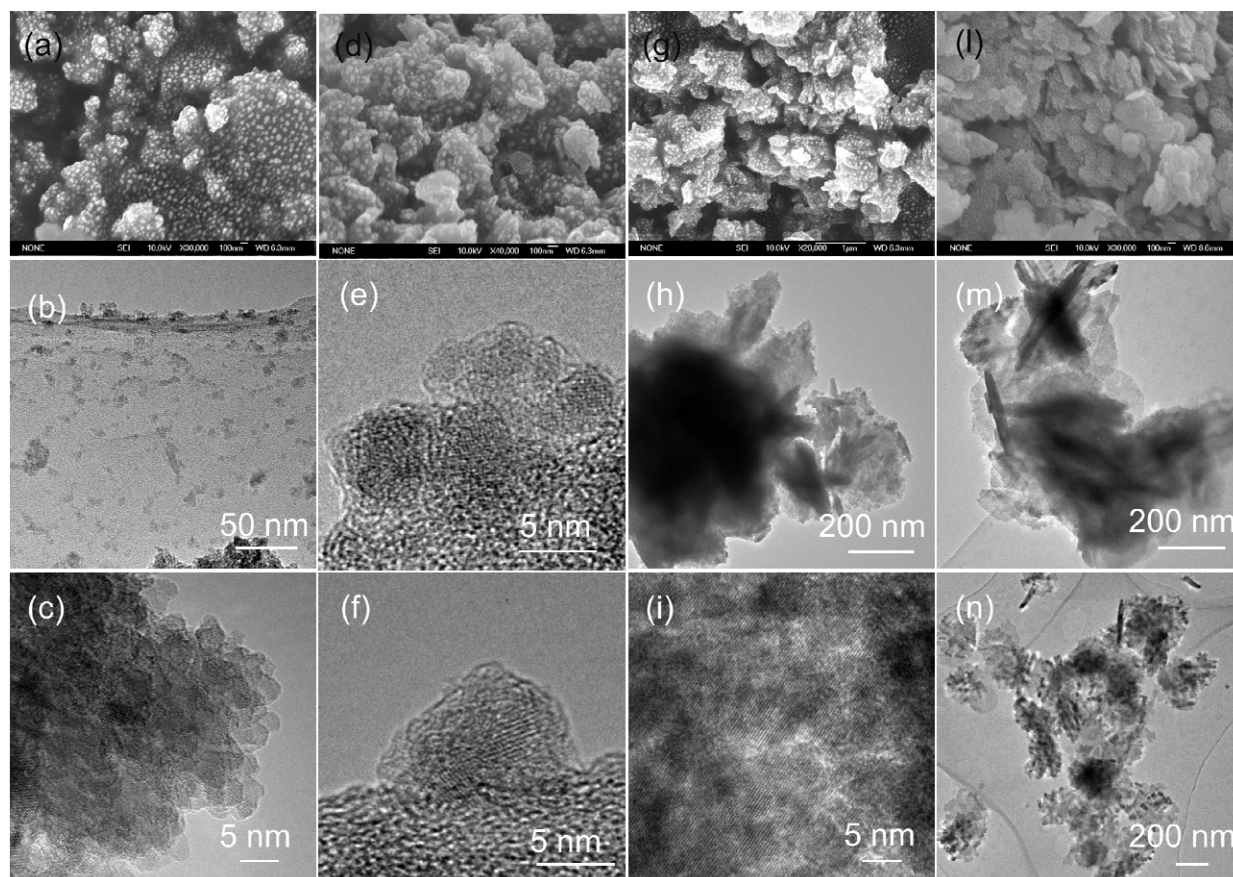

**Fig. S4** The products obtained for different times: (a) SEM image and (b and c) TEM images for 1h; (d) SEM image and (e and f) TEM images for 3h; (g) SEM image and (h and i) TEM images for 5h; (l) SEM image and (m and n) TEM images for 7h.

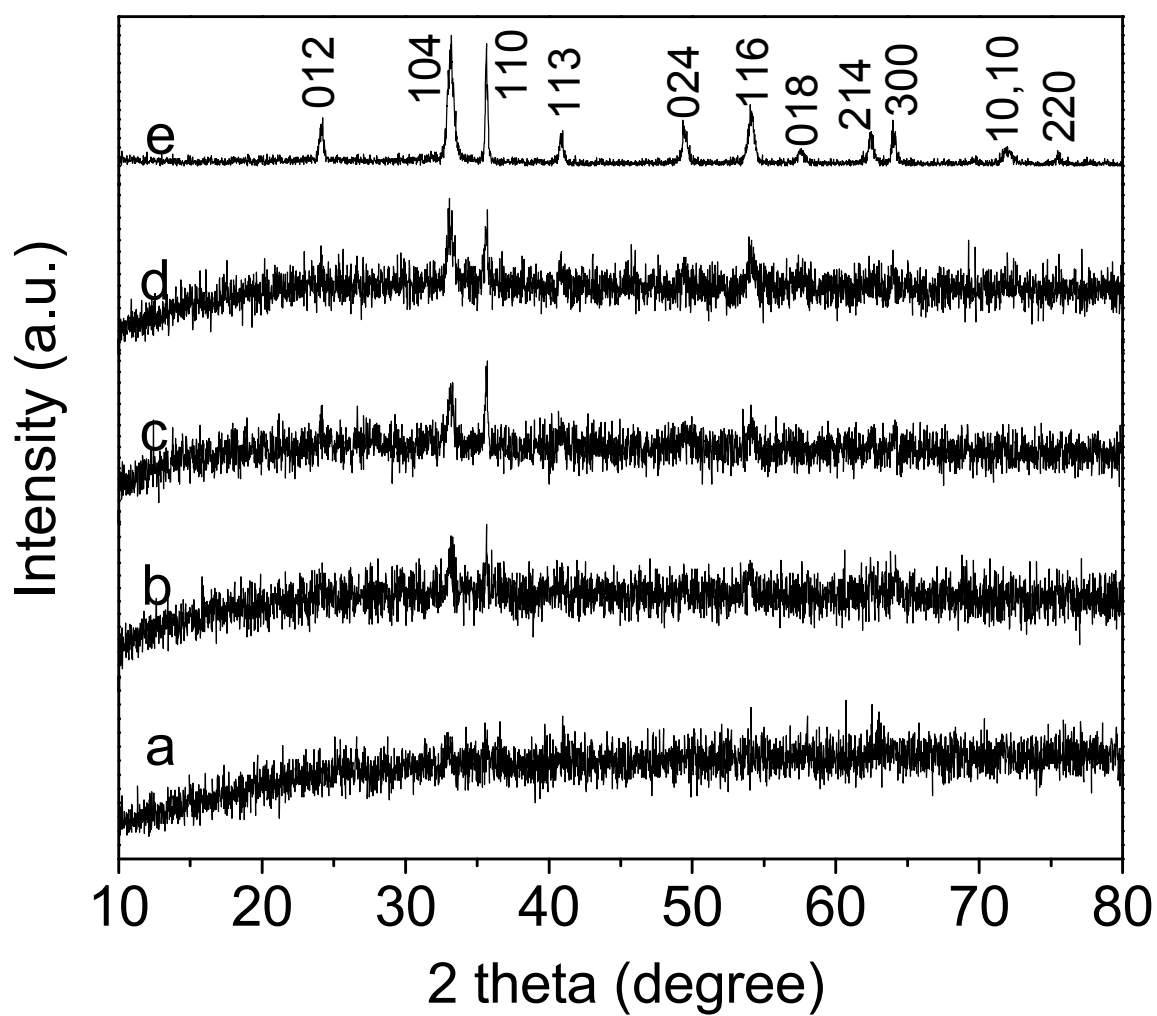

**Fig. S5** XRD pattern for the products obtained for different times: (a) 1h; (b) 3h, (c) 5h; (d) 7h and 12h.
